# Supplementary material for: Quantification of Etoposide Hypersensitivity: A Sensitive, Functional Method for Assessing Pluripotent Stem Cell Quality
Source: PubMed Central journal article supplement — Stem Cells Transl Med. 2017 Sep 19;6(10):1829–39. doi: 10.1002/sctm.17-0116 (PMC6430057; doi:10.1002/sctm.17-0116), 2017-09-19

# Supplementary Data

Figure 2

| Anti-Fibrotic Proteins |                  |                           |                                                                                                                                                                           |
|------------------------|------------------|---------------------------|---------------------------------------------------------------------------------------------------------------------------------------------------------------------------|
| Identified Proteins    | Molecular Weight | Relative Signal Intensity | Function                                                                                                                                                                  |
| MMP2                   | 74 kDa           | 5.67E+09                  | ECM protein degradation*.                                                                                                                                                 |
| MMP3                   | 54 kDa           | 2.33E+07                  | Procollagenase activation; ECM protein degradation: fibronectin, laminin, gelatins of type I, III, IV, and V; collagens III, IV, X, and IX, and cartilage proteoglycans*. |

| Pro-Angiogenic Proteins                                              |                  |                           |                                                                                                                                                                           |
|----------------------------------------------------------------------|------------------|---------------------------|---------------------------------------------------------------------------------------------------------------------------------------------------------------------------|
| Identified Proteins                                                  | Molecular Weight | Relative Signal Intensity | Function                                                                                                                                                                  |
| Basement membrane-specific heparan sulfate proteoglycan core protein | 409 kDa          | 2.76 x 10 <sup>8</sup>    | Attachment substrate for cells; Vascularization; Regulates the vascular response to injury*.                                                                              |
| Endoplasmin                                                          | 92 kDa           | 1.89 x 10 <sup>8</sup>    | Processing and transport of secreted proteins*.                                                                                                                           |
| Angiotensin-related protein 2                                        | 57 kDa           | 1.97 x 10 <sup>8</sup>    | Induces endothelial cell sprouting*.                                                                                                                                      |
| Cluster of Stromelysin-1/ MMP3                                       | 54 kDa           | 2.33 x 10 <sup>7</sup>    | Procollagenase activation; ECM protein degradation: fibronectin, laminin, gelatins of type I, III, IV, and V; collagens III, IV, X, and IX, and cartilage proteoglycans*. |
| Angiotensinogen                                                      | 53 kDa           | 6.14 x 10 <sup>7</sup>    | Regulates blood pressure, body fluid and electrolyte homeostasis. Essential component of the renin-angiotensin system*.                                                   |

\* Functional Data retrieved and adapted from Uniprot.org database.

Relative Intensities of Antifibrotic Proteins

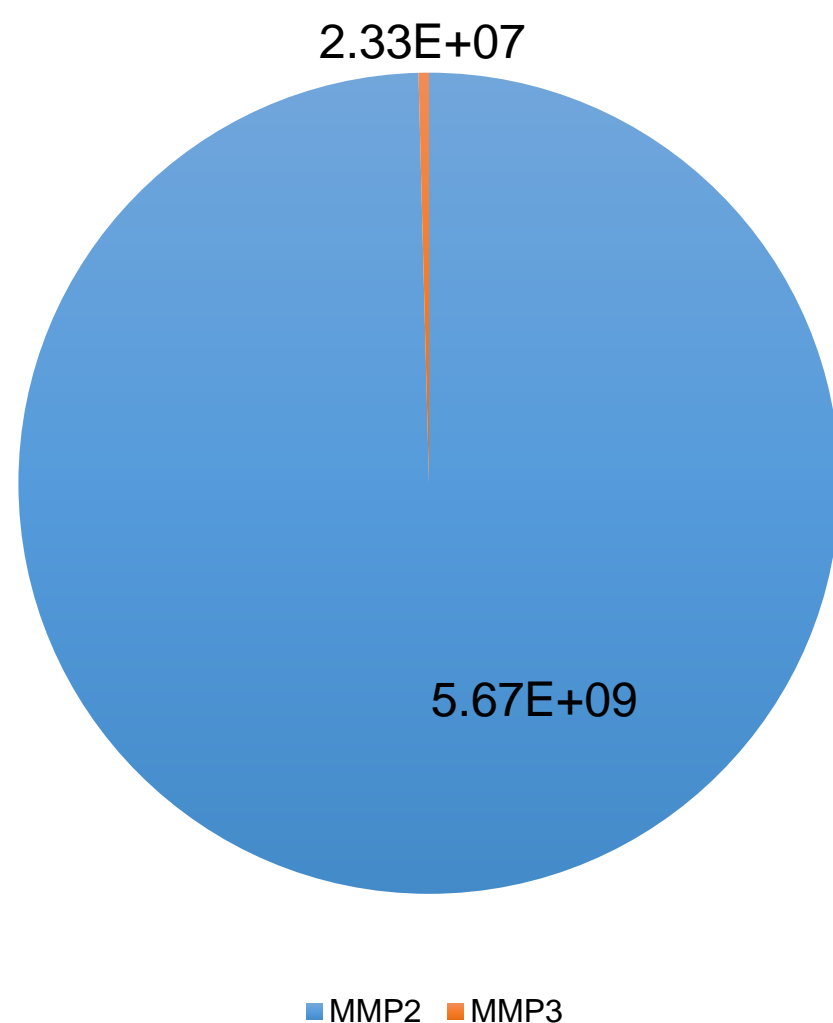

Relative Intensities of Pro-Angiogenic Proteins

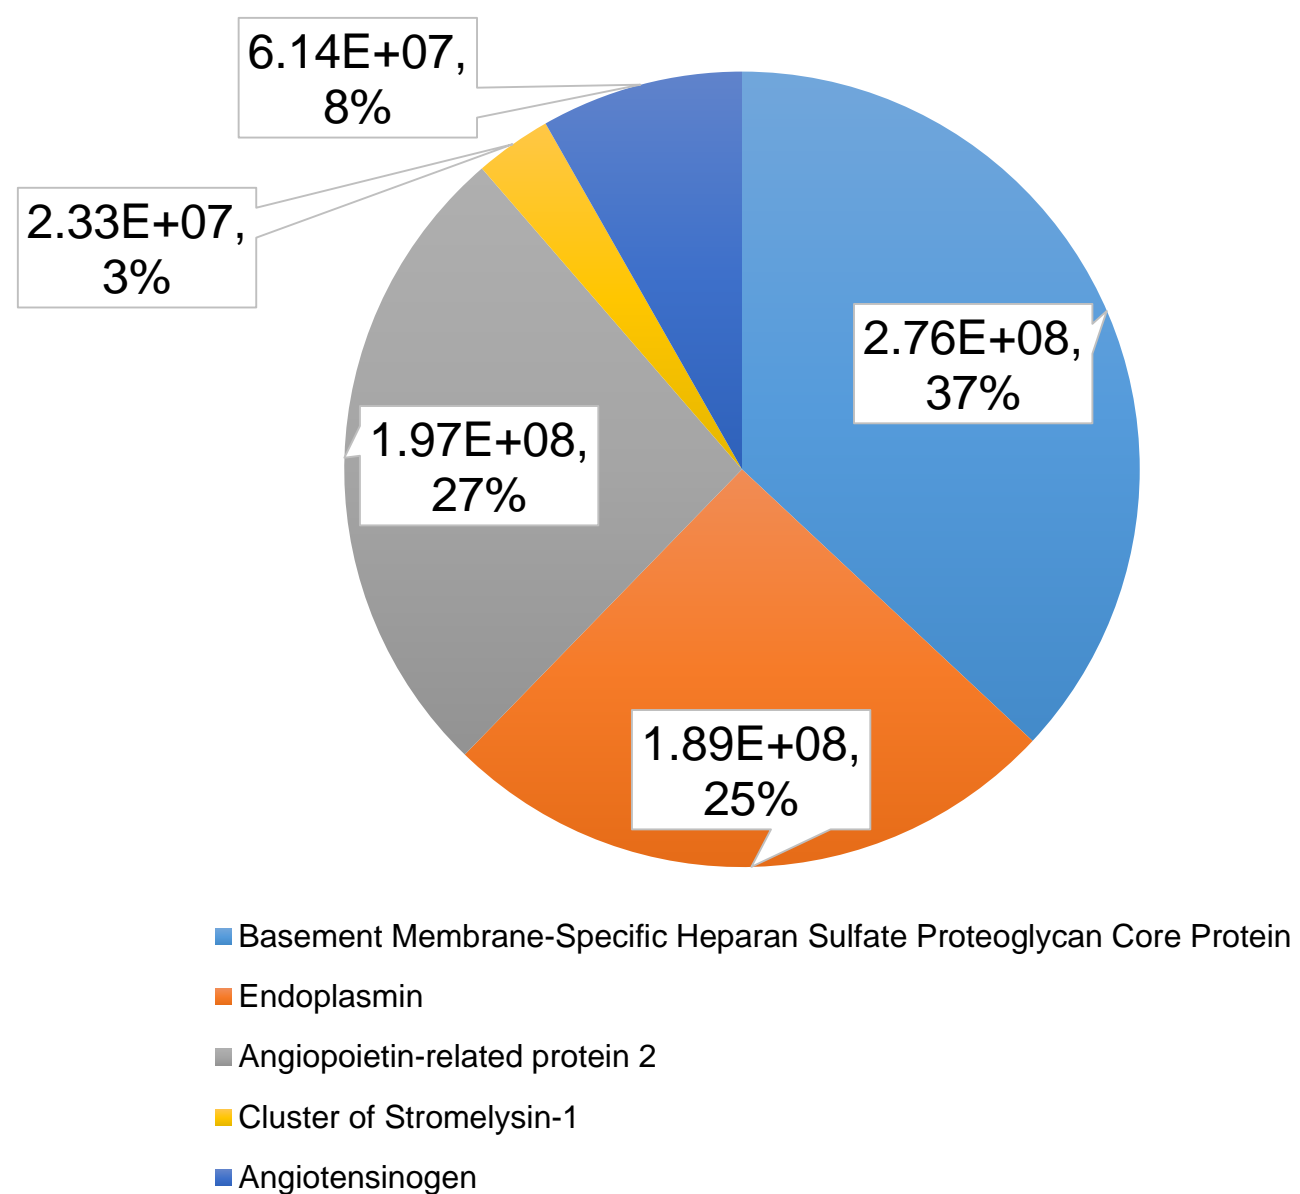

Supplement: SCT3-6-1829-s002.pdf [file SCT3-6-1829-s002.pdf]
