# Supplementary material for: Quantification of Etoposide Hypersensitivity: A Sensitive, Functional Method for Assessing Pluripotent Stem Cell Quality
Source: PubMed Central journal article supplement — Stem Cells Transl Med. 2017 Sep 19;6(10):1829–39. doi: 10.1002/sctm.17-0116 (PMC6430057; doi:10.1002/sctm.17-0116), 2017-09-19

## SUPPLEMENTAL DATA

**Figure 1:** Flow cytometry histogram and bar graph demonstrating the importance of spheroid culture for the increase of pro-Surfactant-Protein-C and Club-Cell-Secretory-Protein in LSCs compared to the EDC (pre-spheroid, explant derived cells) stage. \* indicates  $p < 0.05$  between the means of the LSCs and EDCs.

**Figure 2:** Raw mass spectrometry data indicating the anti-fibrotic and pro-angiogenic proteins found in the LSC-conditioned media.

**Figure 3:** A sample of the immunofluorescent images used to count the pulmonary vessel densities of vessels less than 100  $\mu\text{m}$  based on vWF expression.

# Supplementary Data

Figure 1

## EDC vs LSC Importance of Spheroid Cell Culture

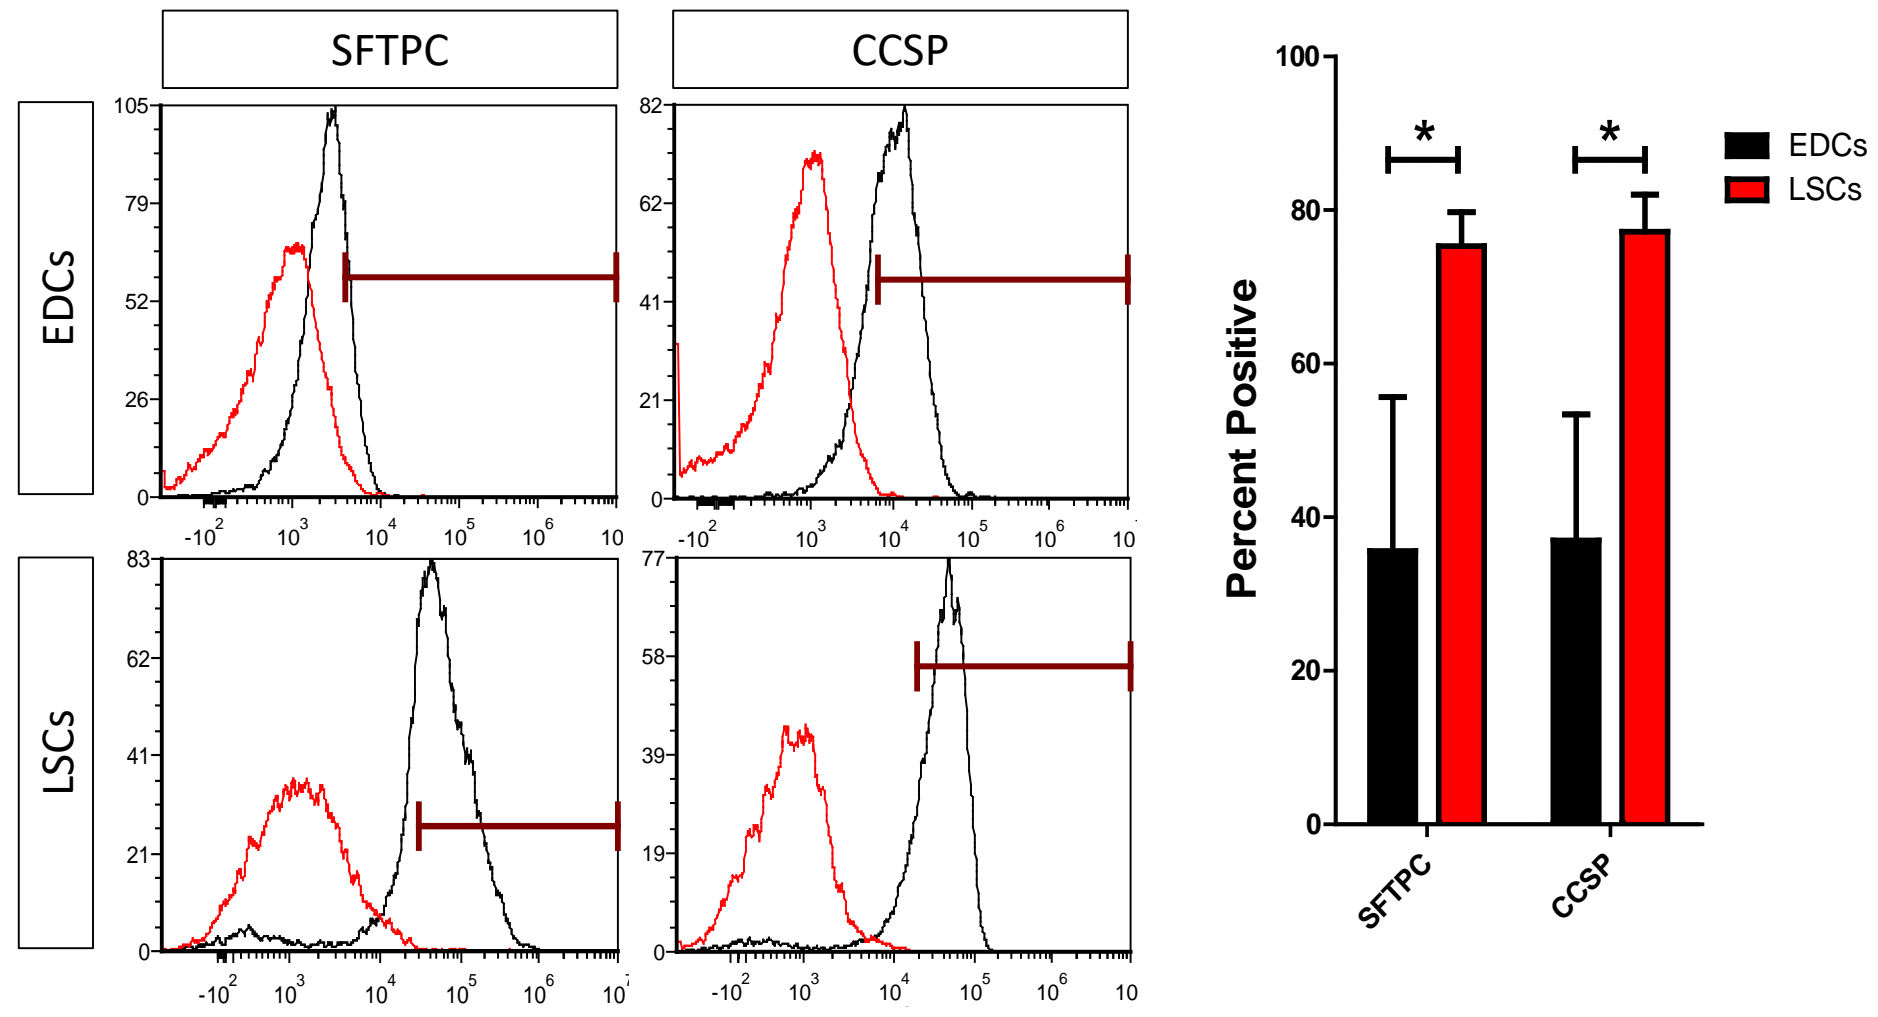

Supplement: SCT3-6-1829-s001.pdf [file SCT3-6-1829-s001.pdf]
