# Supplementary figures and images for: Quantification of Etoposide Hypersensitivity: A Sensitive, Functional Method for Assessing Pluripotent Stem Cell Quality
Source: PubMed Central journal article supplement — Stem Cells Transl Med. 2017 Sep 19;6(10):1829–39. doi: 10.1002/sctm.17-0116 (PMC6430057; doi:10.1002/sctm.17-0116), 2017-09-19

## Supplementary Data

Figure 3

Pulmonary Vessel Densities with External Diameters <100  $\mu\text{m}$ /HPF

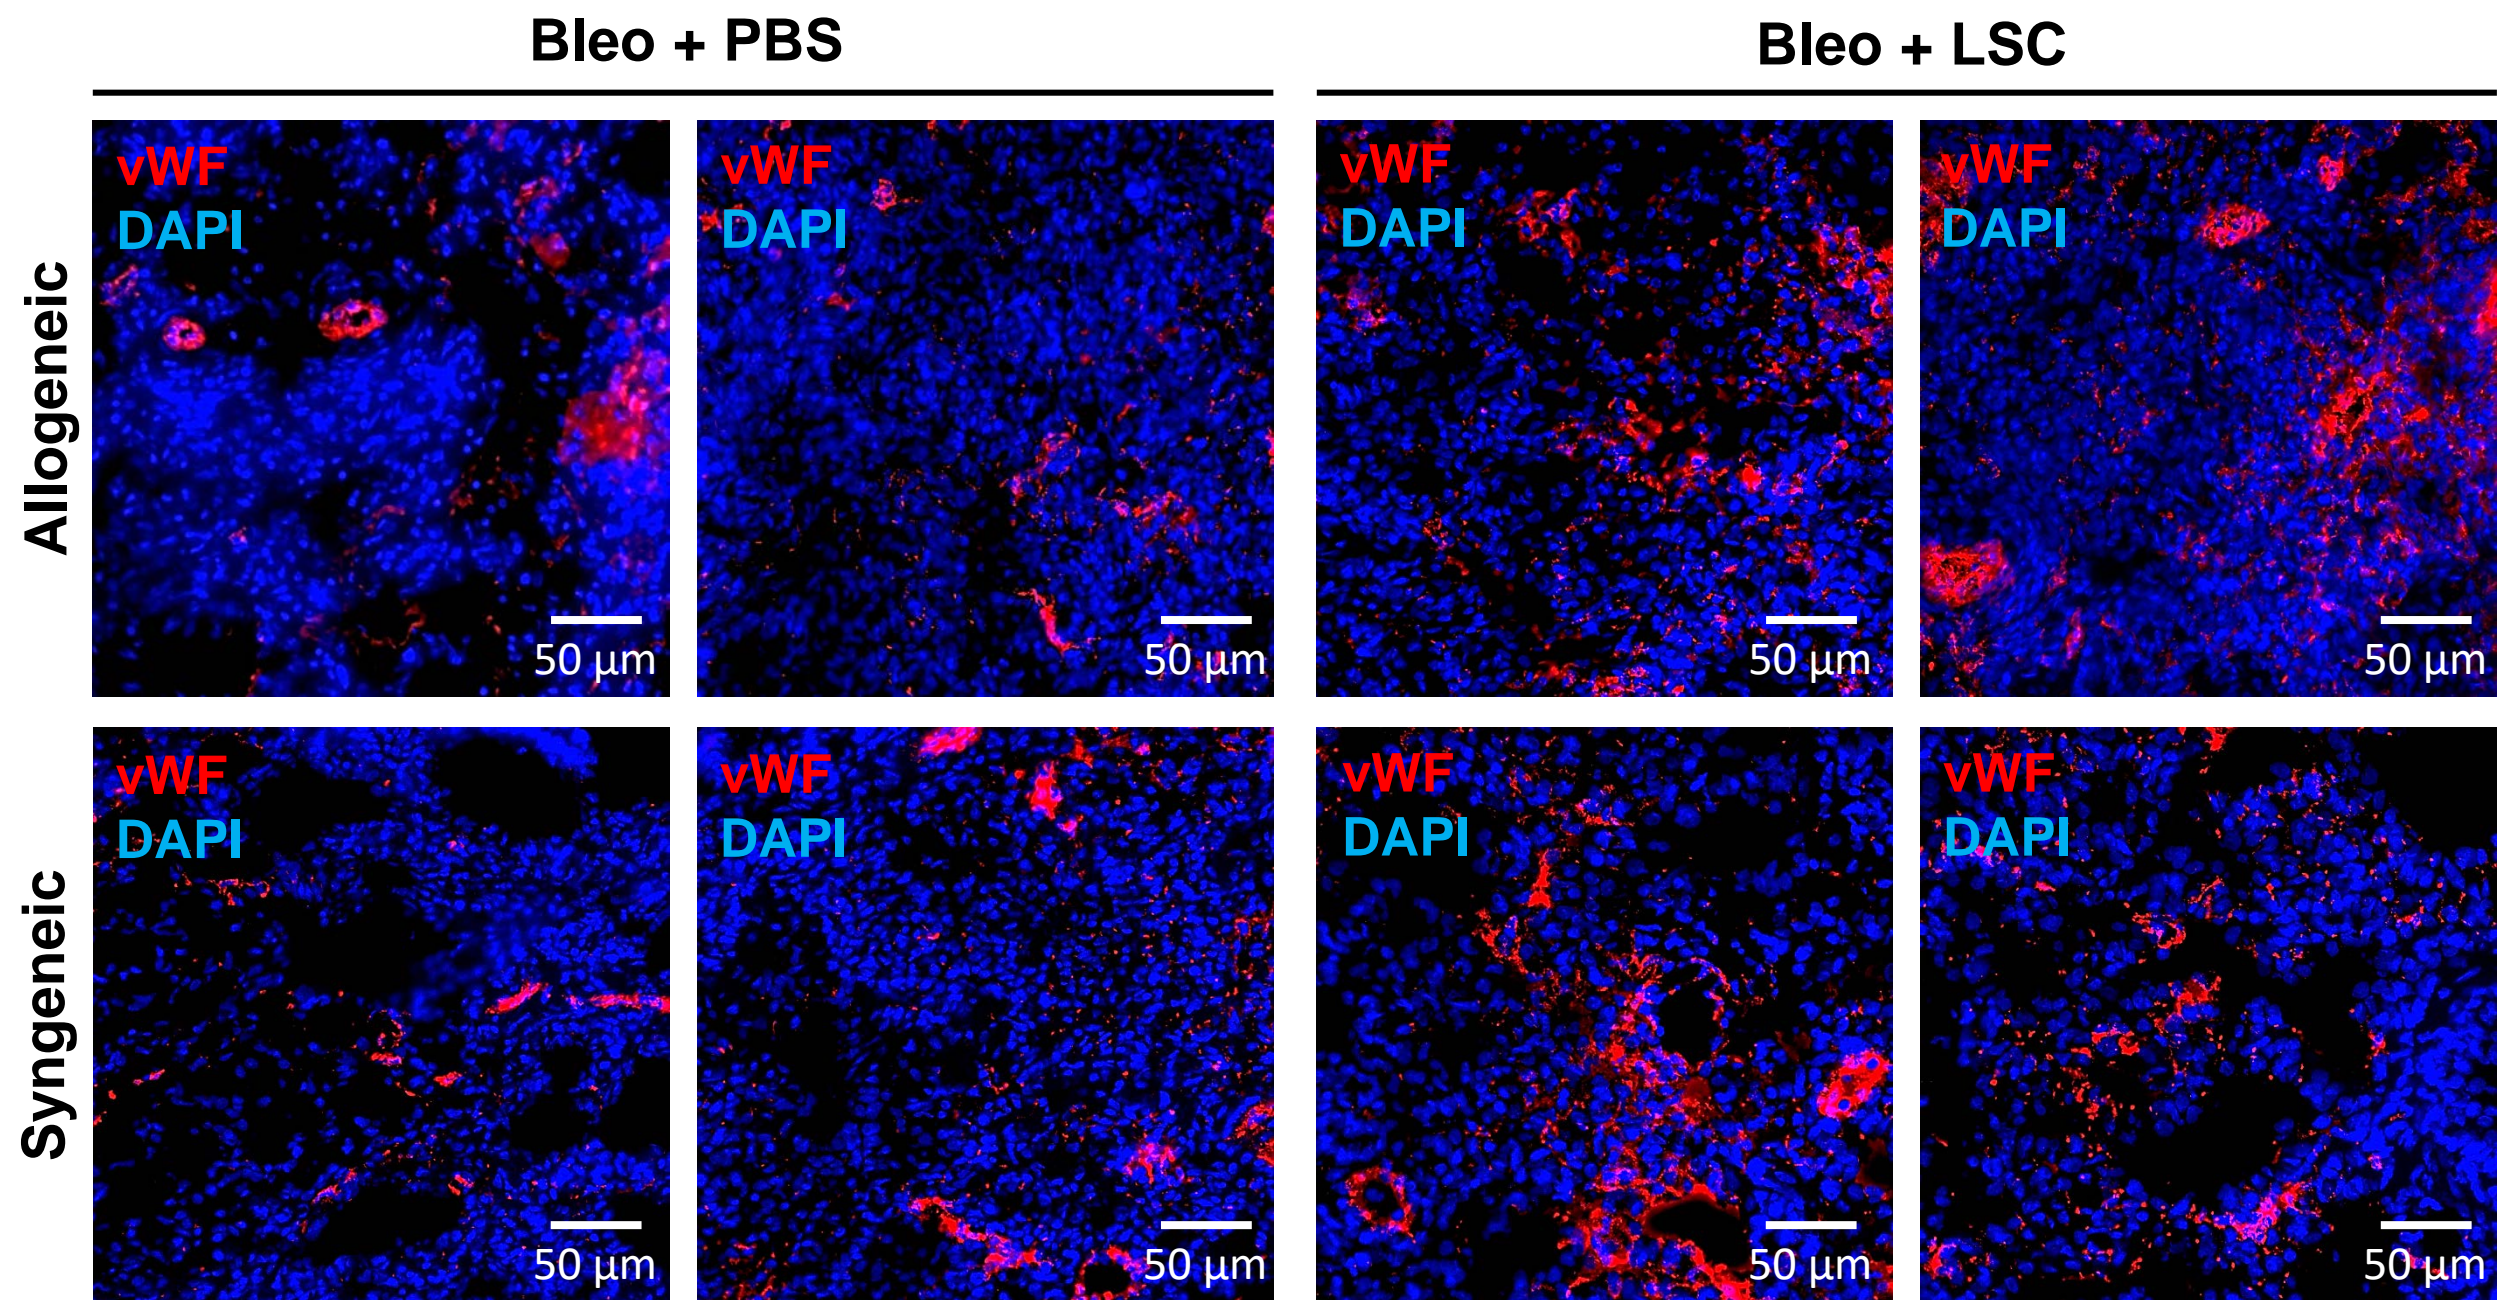

Supplement: SCT3-6-1829-s003.pdf [file SCT3-6-1829-s003.pdf]
